# Supplementary material for: Chronic Diseases & Employment: An Overview of Existing Training Tools for Employers
Source: PubMed Central journal article supplement (PMC6427204; doi:10.3390/ijerph16050718), 2019-02-28
Supplement: ijerph-16-00718-s001.pdf [file ijerph-16-00718-s001.pdf]

## Supplementary Materials

### Online sources consulted for the study

#### Report and Guidelines

1. CEAC and Fomento del Trabajo Nacional. *GESTPYME*, ENWHP: Spain, n.d.; Available online: <http://www.enwhp.org/fileadmin/downloads/models/SME-Project/Spain/GESTPYME.pdf> (accessed not declare)
2. Confederación Sindical de Comisiones Obreras. *ISTAS*, ENWHP: Spain, n.d.; available online: <http://www.enwhp.org/fileadmin/downloads/models/SME-Project/Spain/ISTAS.pdf> (accessed not declare)
3. DuPont Sustainable Solutions. *STOP® Safety Training Observation Program Overview*, USA, 2016; Available online: [http://www.training.dupont.com/content/pdf/dupont-stop/stop-overview\\_factsheet.pdf](http://www.training.dupont.com/content/pdf/dupont-stop/stop-overview_factsheet.pdf) (accessed not declare).
4. European Multiple Sclerosis Platform (EMSP). *A Practical Toolkit for Employers*, EMSP: Brussels, Belgium, n.d.; Available online: [http://www.emsp.org/wp-content/uploads/2016/01/EMSP\\_PPP-Toolkit\\_20ppA4\\_email\\_v2.pdf](http://www.emsp.org/wp-content/uploads/2016/01/EMSP_PPP-Toolkit_20ppA4_email_v2.pdf) (accessed not declare)
5. European Network for Workplace Health Promotion (ENWHP). *Promoting healthy work for workers with chronic illness: A guide to good practice*, ENWHP: Spain, 2012; Available online: [http://www.enwhp.org/uploads/media/ENWHP\\_Guide\\_PH\\_Work\\_final.pdf](http://www.enwhp.org/uploads/media/ENWHP_Guide_PH_Work_final.pdf) (accessed not declare)
6. European Network for Workplace Health Promotion (ENWHP). *Social Coaching*, ENWHP: Spain, 2012; available online :[http://www.enwhp.org/fileadmin/user\\_upload/pdf/PH\\_Work\\_Social\\_Coaching\\_Austria.pdf](http://www.enwhp.org/fileadmin/user_upload/pdf/PH_Work_Social_Coaching_Austria.pdf) (accessed not declare)
7. European Network for Workplace Health Promotion (ENWHP). *The socio-economic enterprise Huset Venture*, ENWHP: Spain, 2012; Available online: [http://www.enwhp.org/fileadmin/user\\_upload/pdf/PH\\_Work\\_Huset\\_Venture\\_Denmark.pdf](http://www.enwhp.org/fileadmin/user_upload/pdf/PH_Work_Huset_Venture_Denmark.pdf) , (accessed not declare).
8. European Network for Workplace Health Promotion (ENWHP). *Strategic approach for sustaining people with chronic illnesses at work"*, ENWHP: Spain, 2012; Available online: [http://www.enwhp.org/fileadmin/user\\_upload/pdf/PH\\_Work\\_Delpeyrat\\_France.pdf](http://www.enwhp.org/fileadmin/user_upload/pdf/PH_Work_Delpeyrat_France.pdf) (accessed not declare)
9. European Network for Workplace Health Promotion (ENWHP). *Implementation of a website dedicated to work and chronic illness*, ENWHP: Spain, 2012; Available online: [http://www.enwhp.org/fileadmin/user\\_upload/pdf/PH\\_Work\\_website\\_work\\_\\_\\_chronic\\_illness\\_France.pdf](http://www.enwhp.org/fileadmin/user_upload/pdf/PH_Work_website_work___chronic_illness_France.pdf) (accessed not declare)
10. European Network for Workplace Health Promotion (ENWHP). *Ford Werke – Disability Management*, ENWHP: Spain, 2012; Available online: [http://www.enwhp.org/fileadmin/user\\_upload/pdf/PH\\_Work\\_Disability\\_Management\\_Ford\\_Germany.pdf](http://www.enwhp.org/fileadmin/user_upload/pdf/PH_Work_Disability_Management_Ford_Germany.pdf) (accessed not declare)
11. European Network for Workplace Health Promotion (ENWHP). *HELLAS EAP*, ENWHP: Spain, 2012; Available online: [http://www.enwhp.org/fileadmin/user\\_upload/pdf/PH\\_Work\\_Hellas\\_EAP\\_Greece.pdf](http://www.enwhp.org/fileadmin/user_upload/pdf/PH_Work_Hellas_EAP_Greece.pdf) (accessed not declare)
12. European Network for Workplace Health Promotion (ENWHP). *Abbott*, ENWHP: Spain, 2012; Available online: [http://www.enwhp.org/fileadmin/user\\_upload/pdf/PH\\_Work\\_Abbott\\_Ireland.pdf](http://www.enwhp.org/fileadmin/user_upload/pdf/PH_Work_Abbott_Ireland.pdf) (accessed not declare)
13. European Patients' Forum . *Recommendations to promote better inclusion of people with chronic conditions in the workplace in the context of the European Pillar of Social Rights*, EPF: Belgium, 2012; Available online:

<http://www.eu-patient.eu/globalassets/policy/employment/recommendations-for-policy-makers.pdf>  
(accessed not declare)

14. Government Denmark. *The Danish National Return-to-work programme: Denmark*, ENWHP: Denmark, 2015; Available online: <https://osha.europa.eu/en/tools-and-publications/publications/denmark-danish-national-return-work-programme/view> (accessed 18 December 2015)
15. The Ministry of Social Affairs and Health – Finland. *Career opportunities for people with partial work ability*, ENWHP: Finland, 2012; Available online: <https://stm.fi/documents/1271139/5417419/Career+Opportunities+for+Persons+With+Partial+Work+Ability+2017.pdf/9766f671-a798-4b74-8f38-1f93b05ff4f6> (accessed not declare)
16. MSA. *Guide for employers*, MSA: Australia, 2016; Available online: [https://mswa.org.au/assets/stories/MSA\\_GuideForEmployers.pdf](https://mswa.org.au/assets/stories/MSA_GuideForEmployers.pdf) (accessed not declare)
17. Northeast Business Group on Health (NEBGH). *Cancer and the Workplace: The Employer, Perspective*, NEBGH: New York, 2015; Available online [http://nebgh.org/wp-content/uploads/2015/10/CancerWorkplace\\_FINAL.pdf](http://nebgh.org/wp-content/uploads/2015/10/CancerWorkplace_FINAL.pdf) (accessed not declare)
18. The Health & Productivity Institute of Australia (HAPIA). *Best-Practice Guidelines*, HAPIA: Australia, 2015 Available online: <http://www.workplacehealth.org.au/UnderstandWorkplaceHealth/best-practice-guidelines> (accessed not declare)

## Websites

1. **The Academic Network of European Disability Experts (ANED)**  
<https://www.disability-europe.net/dotcom>
2. **ACAS (Advisory, Conciliation and Arbitration Service)**  
<http://www.acas.org.uk/index.aspx?articleid=1859>
3. **AIMAC - Associazione Italiane Malati di Cancro**  
<https://www.aimac.it/diritti-del-malato>
4. **AISLA - Associazione Italiana Sclerosi Laterale Amiotrofica- Italy**  
<http://www.aisla.it/formazione/>
5. **AISM - Associazione Italiana Sclerosi Multipla- Italy**  
[https://www.aism.it/index.aspx?codpage=sclerosi\\_multipla\\_contratti\\_lavoro](https://www.aism.it/index.aspx?codpage=sclerosi_multipla_contratti_lavoro)
6. **American Diabetes Association**  
<http://www.diabetes.org/in-my-community/awareness-programs/stop-diabetes-at-work/>
7. **ANDOS Onlus - Associazione Nazionale Donne Operate al Seno - Italy**  
<http://www.andosonlusnazionale.it/informazioni-utili/al-lavoro.html>
8. **Australian Human Rights Commission**  
<https://www.humanrights.gov.au/employers/good-practice-good-business-factsheets>
9. **The American Heart Association**  
<https://www.heart.org/en/professional/workplace-health>
10. **APMAR - Associazione Nazionale Persone con Malattie Reumatologiche e Rare- Italy**  
<https://www.apmar.it/>
11. **The Australian Prevention Partnership Centre**  
<https://preventioncentre.org.au/>
12. **The Big C - Coffee for Cancer**  
<https://www.thebigc-hallenge.com/>
13. **Bender Consulting Services**  
<https://www.benderconsult.com/our%20services/disability-employment-strategy-and-training>
14. **The BC Centre for Employment Excellence**  
<http://www.cfeebc.org/resource/workplace-check-up/>
15. **Cancer Council - Australia**

<https://www.cancercouncil.com.au/cancer-information/work-and-cancer/for-workplaces-employers/?pp=110587>

**16. Canadian Public Health Association**

<http://www.nccmt.ca/knowledge-repositories/search/81>

**17. CDC - Centers for Disease Control and Prevention**

<https://www.cdc.gov/workplacehealthpromotion/initiatives/workathealth/index.html>

**18. The Chronic Disease Prevention Alliance of Canada (CDPAC)**

<http://www.cdpac.ca/content.php?doc=180>

**19. Credit Suisse - Flexibility & Health**

<https://www.credit-suisse.com/corporate/en/responsibility/employer/flexibility-health.html>

**20. Deutsche Bank - Health and work-life balance**

<https://www.db.com/cr/en/our-people/health--and--work-life--balance.html>

**21. EARN (Employer Assistance and Resource Network on Disability Inclusion)**

<http://www.askearn.org/earn-training-center/>

**22. EBC- European Brain Council**

<http://www.notmyselftoday.ca/why-join/>

**23. ECDC - European Centre for Disease Prevention and Control**

<https://ecdc.europa.eu/en/home>

**24. ECPC - European Cancer Patient Coalition**

<http://www.ecpc.org/>

**25. EDF - European Disability Forum**

<http://www.edf-feph.org/disability-advocates-project>

**26. EFA - European Federation of Allergy and Airways Diseases Patients' Association**

<http://www.efanet.org/what-we-do/capacity-building>

**27. EFNA - European Federation of Neurological Associations**

<http://www.brainmindpain.eu/written-declaration-access-to-employment/>

**28. Enel - Diversity and inclusion: the key to our success Policy on Diversity and Inclusion**

<https://www.enel.com/careers/explore-enel/diversity-inclusion>

**29. Employment and Training Corporation - Malta**

<https://investinginyourfuture.gov.mt/project/equal-opportunities-life-long-learning-and-employment/employment-support-for-persons-with-disabilities-37060626>

**30. EORTC - European Organisation for Research and Treatment of Cancer**

<http://www.eortc.org/education-training/>

**31. EPA - European Psychiatric Association**

<http://www.europsy.net/education/courses/itinerant-courses/>

**32. EULAR - European League Against Rheumatism**

<https://www.eular.org/>

**33. Europa Donna - Italy**

<http://europadonna.it/tumore-e-lavoro/>

**34. European Public Health Alliance**

<https://mhe-sme.org/>

**35. FAVO - Federazione delle Associazioni di Volontariato in Oncologia - Italy**

<https://www.favo.it/diritti-malato-normativa.html>

**36. FESCA, Federation of European Scleroderma Associations**

<http://www.worldsclerofound.org/fesca/>

**37. Generali – Wellbeing**

<https://www.general.com/it/our-responsibilities/investing-in-our-people/health-and-safety>

**38. The Great-West Life Centre for Mental Health in the Workplace**

<https://www.workplacestrategiesformentalhealth.com/managing-workplace-issues/supporting-employee-success-a-tool-to-plan-accommodations>

**39. IDF Europe - International Diabetes Federation**

<https://www.idf.org/our-network/regions-members/europe/welcome.html>

**40. IDA - International Disability Alliance**

<http://www.internationaldisabilityalliance.org/content/bridge-crpd-sdg-training>

**41. INCa - The French National Cancer Institute**

<http://en.e-cancer.fr/The-Cancer-Plan-2014-2019>

**42. ILO Global Business and Disability Network**

<http://www.businessanddisability.org/satools/?mod=about>

**43. IncontraDonna Onlus - Italy**

<http://www.incontradonna.it/index/eventi-e-progetti/582-il-welfare-aziendale-funziona-e-incontradonna-lo-sostiene-seminari-sulla-salute-della-donna-e-dell-uomo-per-i-dipendenti-di-ferrovie-dello-stato>

**44. Mental Health Europe**

<https://mhe-sme.org/>

**45. Mentally Healthy Workplace Alliance**

<https://www.headsup.org.au/training-and-resources/educational-and-training/national-workplace-program>

**46. Mental Health America (MHA)**

<http://www.mentalhealthamerica.net/workplace-wellness#Top5Job>

**47. Ministry of Labour and Social Policy, Employment Agency**

<https://egov.bg/wps/portal/en>

**48. National Heart Foundation of Australia**

<https://www.heartfoundation.org.au/for-professionals/physical-activity/workplace-wellness>

**49. The Office of Disability Employment Policy (ODEP)**

[https://www.dol.gov/odep/topics/Mental\\_Health.html](https://www.dol.gov/odep/topics/Mental_Health.html)

**50. Pirelli - Welfare and initiatives for the internal community**

<http://annual-report-2014.pirelli.it/management-report/en/report-value-chain-responsible-management-0/social-dimension/internal-community/welfare-and#.Wr4vgC5uYdU>

**51. Sodexo – Diversity and Inclusion: how we act**

<https://www.sodexo.com/home/corporate-responsibility/diversity-and-inclusion/how-we-act.html>

**52. Jobcentrum**

<https://www.rentree.eu/>

**53. The World Bank**

<http://www.worldbank.org/en/events/2016/03/09/out-of-the-shadows-making-mental-health-a-global-priority>
